# Supplementary material for: Discovery of a proteolytic flagellin family in diverse bacterial phyla that assembles enzymatically active flagella
Source: PubMed Central journal article supplement (PMC5595980; doi:10.1038/s41467-017-00599-0), 2017-09-12
Supplement: 41467_2017_599_MOESM1_ESM.pdf [file 41467_2017_599_MOESM1_ESM.pdf]

### **Description of Supplementary Files**

File name: Supplementary Information

Description: Supplementary figures, supplementary tables and supplementary discussion.

File name: Peer review file

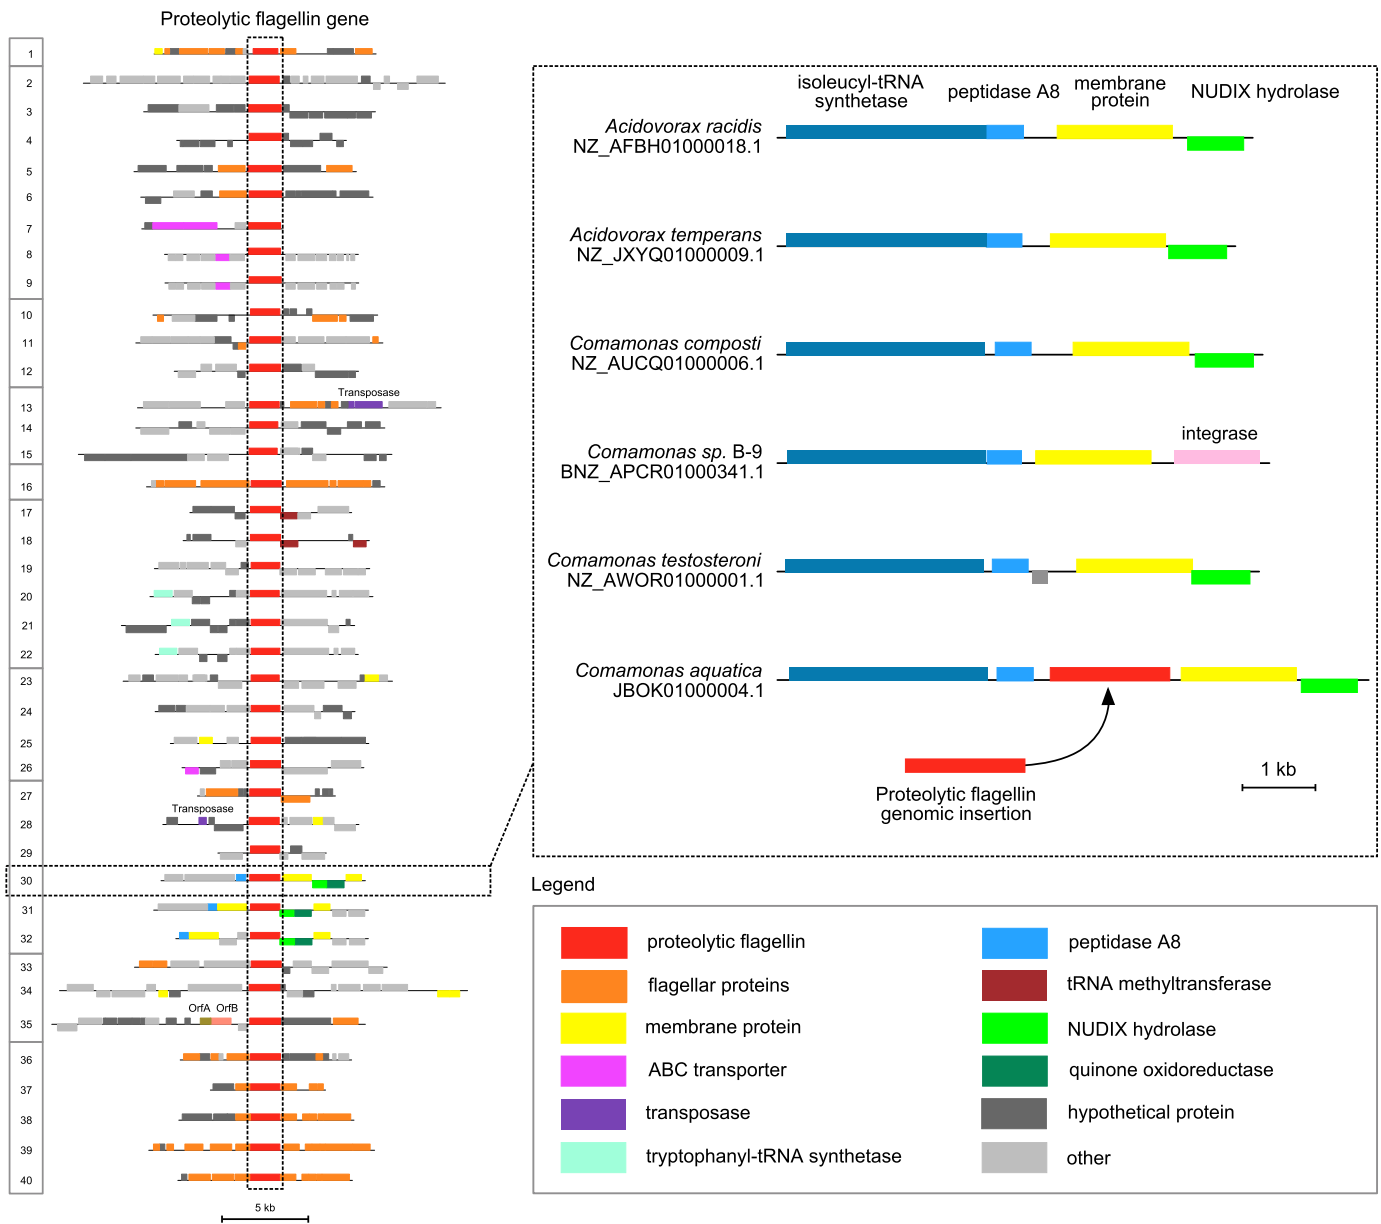

**Supplementary Figure 1 | Genomic context surrounding the proteolytic flagellin gene in 40 genomes (left) and evidence for a proteolytic flagellin gene insertion into a conserved *Comamonadaceae* gene cluster (right).** The 40 gene clusters are ordered into ten clusters based on a phylogeny of the flagellin protease domain. Species and NCBI accession numbers corresponding to the numbering in the left panel is as follows: 1 - *Lysinibacillus sinduriensis* BLB-1 JPVO01000045.1; 2 - *Eubacterium cellulosvens* ATCC 43171 NZ\_CM001487.1; 3 - *Lachnospiraceae* bacterium M18-1 NZ\_KE159611.1; 4 - *Dorea* sp. 5-2 NZ\_KE159737.1; 5 - *Butyrivibrio* sp. LC3010 NZ\_AUJU01000005.1; 6 - *Butyrivibrio* sp. AC2005 NZ\_AUJI01000009.1; 7 - *Pseudobutyrvibrio* sp. MD2005 NZ\_JHXE01000016.1; 8 - *Butyrivibrio* sp. AD3002 NZ\_ATVV01000009.1; 9 - *Butyrivibrio* sp. WCD2001 NZ\_KE384200.1; 10 - *Colwellia piezophila* ATCC BAA-637 NZ\_KB905162.1; 11 - *Pseudoalteromonas tunicata* D2 NZ\_AAOH01000002.1; 12 - *Ferrimonas kyonanensis* DSM 18153 NZ\_KE384363.1; 13 - *Desulfitobacterium dichloroeliminans* LMG P-21439 NC\_019903.1; 14 - *Oceanospirillum bejerinckii* DSM 7166 NZ\_AULT01000024.1; 15 - *Oceanospirillum maris* DSM 6286 NZ\_KE383937.1; 16 - *Desulfuromonas acetoxidans* DSM 684 NZ\_AAEW02000008.1; 17 - *Psychromonas ossibalaenae* ATCC BAA-1528 NZ\_KB906968.1; 18 - *Psychromonas aquimarina* str. ATCC BAA-1526 NZ\_AUAM01000014.1; 19 - *Azoarcus* sp. BH72 NC\_008702.1; 20 - *Massilia* sp. JS1662 JPQD01000035.1; 21 - *Massilia niastensis* DSM 21313 NZ\_KB908111.1; 22 - *Massilia alkalitolerans* DSM 17462 NZ\_ATYR01000022.1; 23 - *Desulfosporosinus orientis* DSM 765 NC\_016584.1; 24 - *Pseudomonas alcaligenes* OT 69 NZ\_ATCP01000169.1; 25 - *Methyloversatilis* sp. NVD NZ\_KB889967.1; 26 - *Chitinibacter tainanensis* DSM 15459 NZ\_AUCN01000004.1; 27 - *Bacillus firmus* DS1 APVL01000005.1; 28 - *Aquaspirillum serpens* DSM 68 NZ\_ATVC01000046.1; 29 - *Acidovorax* sp. CF316 NZ\_AKJX01000208.1; 30 - *Comamonas aquatica* DA1877 JBOK01000004.1; 31 - *Hylemonella gracilis* ATCC 19624 NZ\_AEGR01000102.1; 32 - *Hylemonella gracilis* str. Niagara R JEMG01000001.1; 33 - *Clostridium saccharoperbutylacetonicum* ATCC 27021 NC\_020291.1; 34 - *Acetobacterium woodii* ATCC 29683 NC\_016894.1; 35 - *Selenomonas ruminantium* subsp. lactilytica str. TAM 6421 NC\_017068.1; 36 - *Paenibacillus wynnii* str. DSM 18334 JQCR01000002.1; 37 - *Clostridium novyi* A str. BKT29909 JENM01000026.1; 38 - *Clostridium novyi* A str. 4570 JDRX01000001.1; 39 - *Clostridium botulinum* C/D str. DC5 JDRY01000001.1; 40 - *Clostridium haemolyticum* NCTC 9693 JENX01000076.1

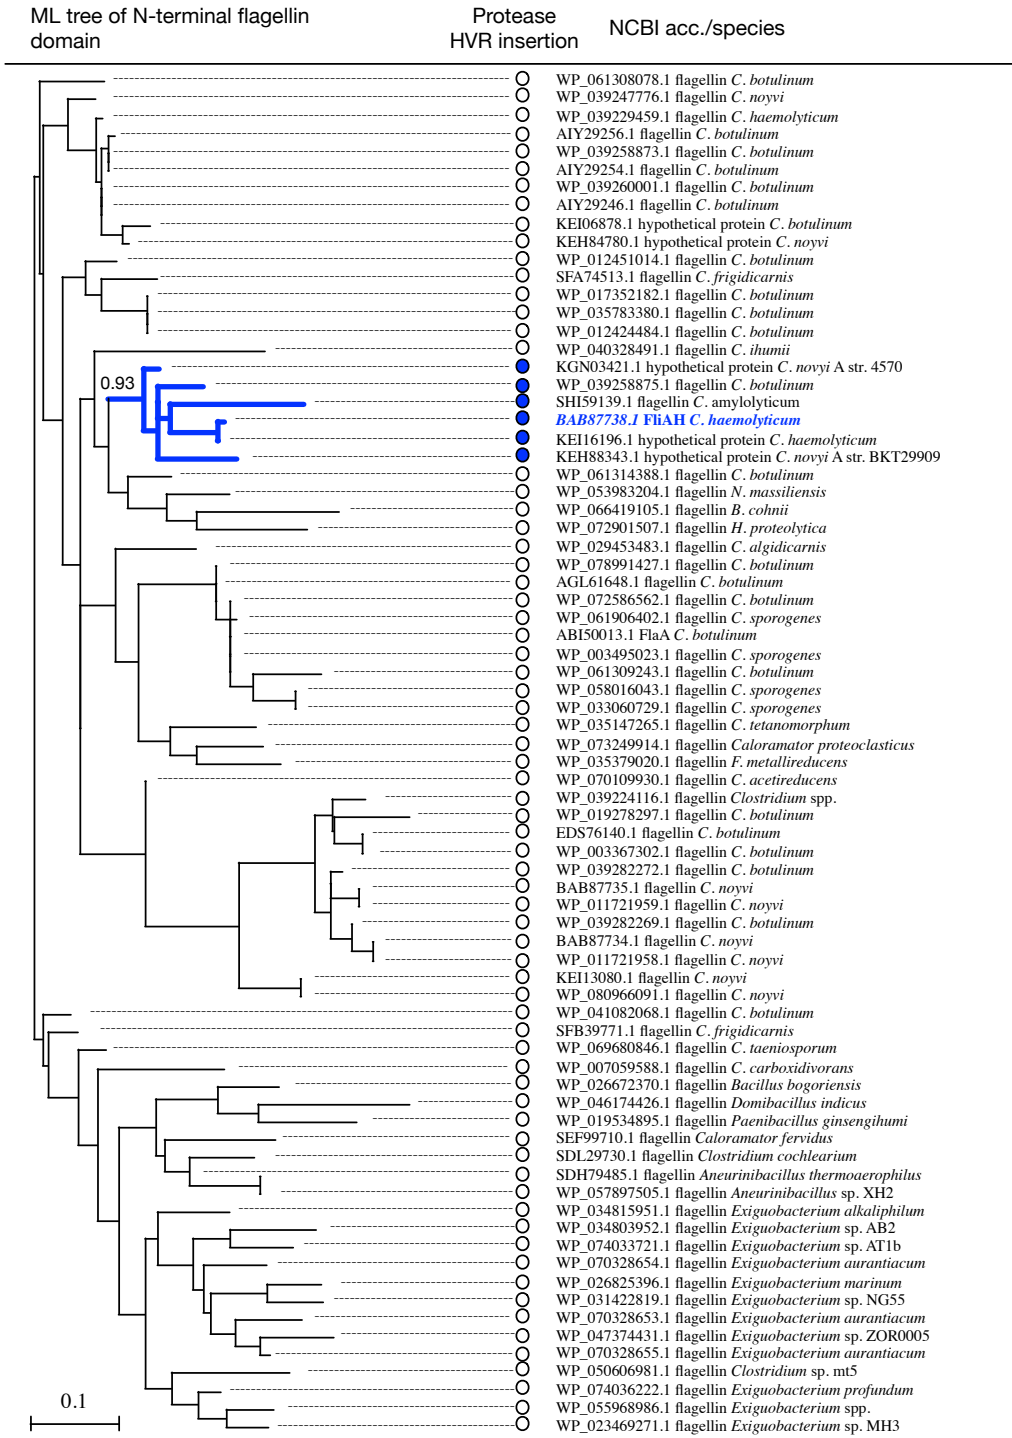

**Supplementary Figure 2 | Phylogeny of the top BLAST hits to the N-terminal flagellin domain of *C. haemolyticum* FliA(H) (flagellinolysin, NCBI accession number BAB87738.1).** Flagellinolysin forms a well-supported (0.93 aLRT value) monophyletic cluster with related sequences that contain a unique protease domain insertion within their hypervariable region. The protease domain is absent in all other members of this tree.

### LC-MS/MS analysis of Trx::FliA(H)-HVR by trypsin

92% sequence coverage

1 **MSDKIIHLTD** **DSFDTDVLKA** **DGAILVDFWA** **EWCGPCKMIA** **PILDEIADEY**  
51 **QGKLTVAKLN** **IDQNPGTAPK** **YGIRGIPTLL** **LFKNGEVAAT** **KVGALSKGQL**  
101 **KEFLDANLAG** **SGSGHMHHHH** **HHSSGLVPRG** **SGMKETAATAK** **FERQHMDSPD**  
151 **LGTDDDDKMK** **GLKTGWIEKS** **VENIKTAYGI** **EPTGANKLKV** **TISDDGAYGV**  
201 **LASVTPKTGE** **FELHIDSSDF** **EKGDGESGNN** **IHGKLYDDRI** **IQHEMTHAVM**  
251 **NDALGIDKMN** **DLHDKNKLWF** **IEGTAEAMAG** **ADERVKDIIG** **NDTQTGIDNT**  
301 **KLSKLATRAD** **ALLNGVSWNS** **SDEYAAGYL** **MVKYIASKGI** **DLKAVMKEIK**  
351 **NTGASGLDNK** **IDLTLNKIDF** **KNNLENYIKD** **ISKVHLDWDD** **DEKDVGSIIG**  
401 **SDHGHGDIKA** **EDVVKGTTPE** **KEQPLDKFKI** **IWPDDNSDNT** **TGKIQLQVGA**  
451 **NEGQSITILE**

Blue: trx-domain; Green: hexahistidine-tag; Red: enterokinase cleavage site; Black: peptidase domain of *C. haemolyticum* FliA(H). Peptides in bold were identified by MS/MS analysis at a false discovery rate (FDR) of 1%.

**Supplementary Figure 3 | LC-MS/MS results for the recombinant FliA(H)-HVR protein.** Sequence coverage of FliA(H)-hypervariable region (HVR) based on peptides identified by LC-MS/MS at an FDR  $\leq$  1%. Trx, thioredoxin-tag on the recombinant protein.





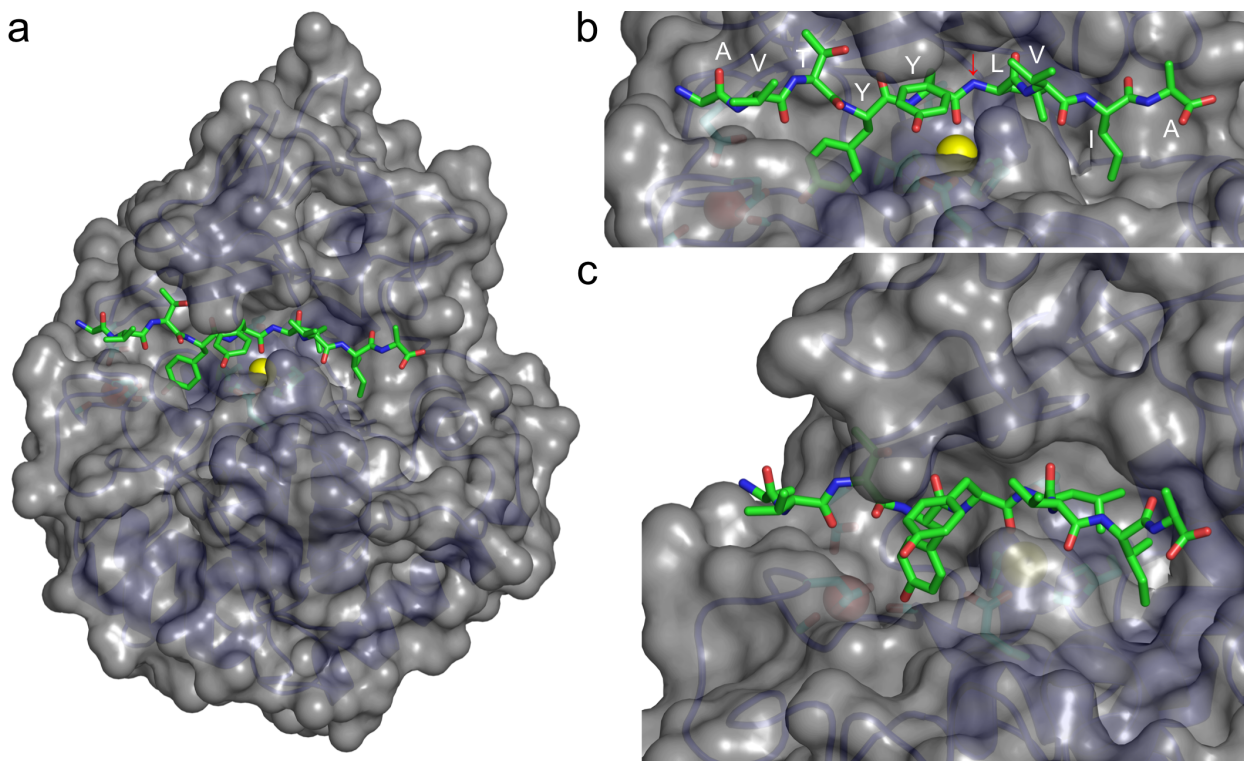

**Supplementary Figure 5 | Peptide docking model using the predicted structure of the protease domain of *Clostridium haemolyticum* FliA(H) and the (AVTY $\downarrow$ LVIA) nonapeptide based on the consensus specificity determined by PICS. (a) Whole view of FliA(H) protease domain-peptide docking model. (b) A zoomed view of the peptide-binding groove with peptide residues labeled in white and the cleavage site indicated by a red arrow. (c) A second zoomed view rotated 25 degrees counterclockwise revealing steric complementarity between the peptide and binding groove.**

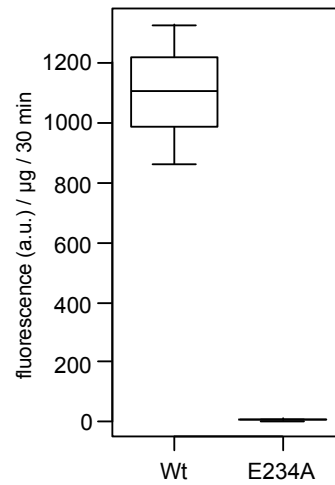

**Supplementary Figure 6 | Fluorometric peptidase assays for FliA(H)-HVR (wild type) versus inactive mutant FliA(H)-HVR (E234A) using the quenched fluorescent peptidic substrate with the sequence ALGL.** A box plot is shown with the activity normalized over three time points and calculated from total of six data points per sample. Box plots show the minimum value (bottom line), lower quartile (bottom line of box), median value (middle line in box), upper quartile (top line of box), and maximum value (top line). Box plots were created using the `boxplot()` function in R.



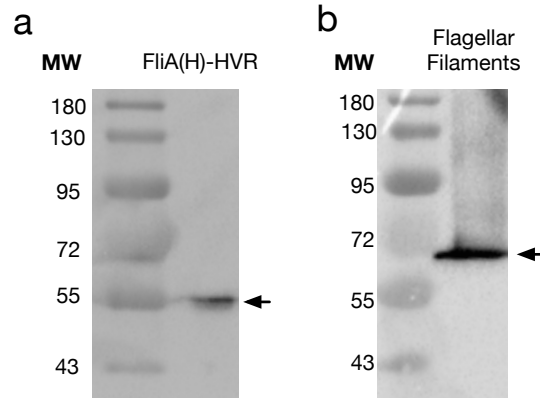

**Supplementary Figure 8 | Western blot validation of the anti-FliA(H)-hypervariable region antibody.** Immunoblot (10% SDS-PAGE) using (a) expressed recombinant FliA(H) hypervariable region (HVR) protease and (b) purified flagellar filaments sheared from *Clostridium haemolyticum*. The apparent molecular weights of the major bands match the predicted values [50.1 kDa for FliA(H)-HVR and 61 kDa for full length FliA(H)].

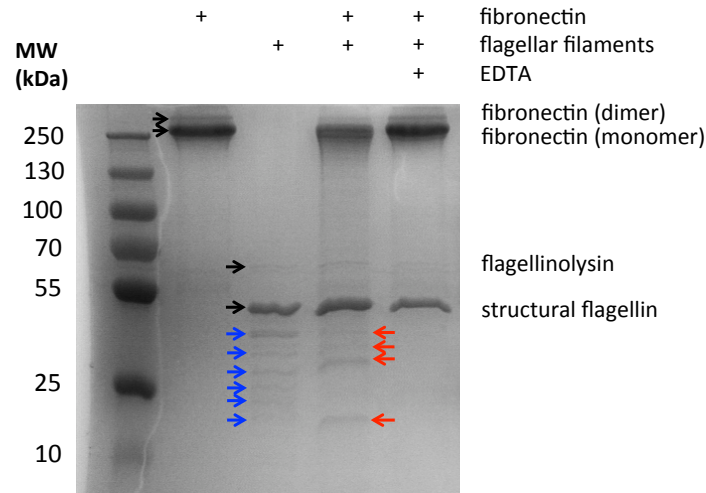

**Supplementary Figure 9 | SDS PAGE (10 %) analysis of *in vitro* digestion (12 h, 37 °C) of bovine fibronectin with *C. haemolyticum* flagellar filaments containing the metalloprotease domain (flagellinolysin).** Minor digestion of bovine fibronectin was apparent over 12 h generating distinct cleavage products (red arrows), including notable conversion of the 440-kDa fibronectin dimer form to the ~240 kDa monomer. The loss of the ~440 dimer indicates that a C-terminal cleavage occurs, potentially at 2403EY↓LGA2407, which matches the PICS determined cleavage specificity (Fig. 4C). This site lies N-terminal to the C-terminal interchain crosslink sites between Cys2459 and Cys2463 on fibronectin. Notably cleavage was blocked by 5 mM EDTA confirming divalent cation dependency, characteristic of metalloproteinase activity. Moreover, flagellar filament self-proteolysis of structural flagellin by flagellinolysin was also observed (blue arrows), which was not present at 0 h (see also Fig. 4e) and was lost in the presence of 5 mM EDTA. Recombinant non-polymerized flagellinolysin enzyme displayed no activity on fibronectin (not shown). This suggests that flagellinolysins in their native state, *i.e.* assembled as a component of flagellar filaments, may cleave specific host proteins and that such cleavages are potentiated by structural changes or by processivity efficiencies acquired following assembly onto a stable platform. Thus, flagellinolysin in the context of full-length flagellar filaments can cleave macromolecular protein substrates as may be present in infected animal tissues or biofilms.

Fig. 3a

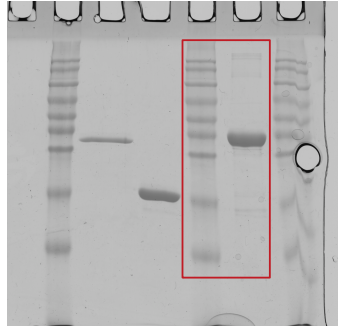

Sup. Fig. 9

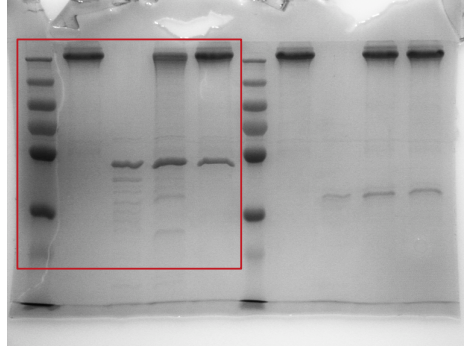

Fig. 3e

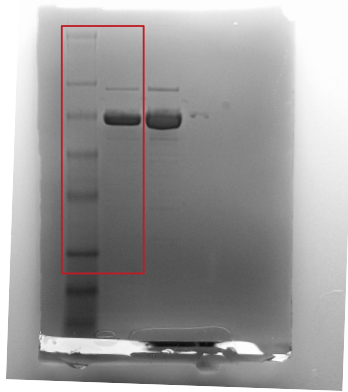

Sup. Fig. 8 (left)

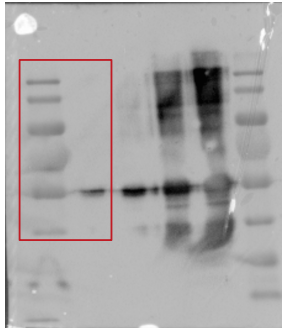

Sup. Fig. 8 (right)

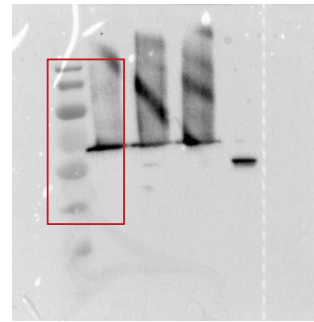

**Supplementary Figure 10 | Uncropped images of gels from Figure 3 and Supplementary Figures 8 and 9.**

**Supplementary Table 1. Flagellin associated domain architectures and their abundance in the NCBI database as detected using the Conserved Domain Database.** All flagellins analyzed contain Flagellin\_N and Flagellin\_C domains. Flagellin architectures with putative enzymatic domains in their hypervariable region are shaded.

| # Seqs. | Taxonomy                   | Taxid   | Accessions                              | Domain Architecture                                        | Protease? |
|---------|----------------------------|---------|-----------------------------------------|------------------------------------------------------------|-----------|
| 21667   | Bacteria                   | 2       | pfam00669~pfam00700                     | Flagellin_N~Flagellin_C                                    |           |
| 3286    | cellular organisms         | 131567  | pfam00669~pfam07196~pfam00700           | Flagellin_N~Flagellin_IN~Flagellin_C                       |           |
| 715     | Proteobacteria             | 1224    | pfam00669~pfam08884~pfam00700           | Flagellin_N~Flagellin_D3~Flagellin_C                       |           |
| 417     | Proteobacteria             | 1224    | pfam00669~pfam12445~pfam00700           | Flagellin_N~FliC~Flagellin_C                               |           |
| 155     | Rhizobiales                | 356     | pfam00669~pfam07482~pfam00700           | Flagellin_N~DUF1522~Flagellin_C                            |           |
| 67      | Burkholderiaceae           | 119060  | pfam00669~pfam12613~pfam00700           | Flagellin_N~FliC_SP~Flagellin_C                            |           |
| 35      | Bacteria                   | 2       | pfam00669~pfam01752~pfam00700           | Flagellin_N~Peptidase_M9~Flagellin_C                       | Y         |
| 24      | Bacteria                   | 2       | pfam00669~pfam11863~pfam00700           | Flagellin_N~DUF3383~Flagellin_C                            |           |
| 21      | Bacteria                   | 2       | pfam00669~cl00057~pfam00700             | Flagellin_N~vWFA~Flagellin_C                               |           |
| 17      | Acinetobacter sp. CAG:196  | 1262690 | pfam00669~pfam05342~pfam00700           | Flagellin_N~Peptidase_M26_N~Flagellin_C                    | Y         |
| 12      | Bacteria                   | 2       | pfam00669~cl14813~pfam00700             | Flagellin_N~GluZincin~Flagellin_C                          | Y         |
| 10      | Desulfovibrionales         | 213115  | pfam00669~cl21531~pfam00700             | Flagellin_N~Sialidase~Flagellin_C                          |           |
| 10      | Pseudomonas                | 286     | pfam00669~pfam04004~pfam00700           | Flagellin_N~Leo1~Flagellin_C                               |           |
| 9       | Bacteria                   | 2       | pfam00669~pfam07196~cl00160~pfam00700   | Flagellin_N~Flagellin_IN~LbetaH~Flagellin_C                |           |
| 9       | Proteobacteria             | 1224    | pfam00669~cl14106~pfam00700             | Flagellin_N~Rifin_STEVOR~Flagellin_C                       |           |
| 7       | Bacteria                   | 2       | pfam00669~cl21456~pfam00700             | Flagellin_N~Periplasmic_Binding_Protein_Type_2~Flagellin_C |           |
| 7       | delta/epsilon subdivisions | 68525   | pfam00669~cl00160~pfam00700             | Flagellin_N~LbetaH~Flagellin_C                             |           |
| 5       | Bacteria                   | 2       | pfam00669~cl21454~pfam00700             | Flagellin_N~NADB_Rossmann~Flagellin_C                      |           |
| 5       | Enterobacteriaceae         | 543     | pfam00669~cl12013~pfam00700             | Flagellin_N~BAR~Flagellin_C                                |           |
| 5       | Proteobacteria             | 1224    | pfam00669~cl19731~pfam00700             | Flagellin_N~SipA~Flagellin_C                               |           |
| 5       | Proteobacteria             | 1224    | pfam00669~cl16912~pfam00700             | Flagellin_N~MDR~Flagellin_C                                |           |
| 4       | Proteus mirabilis          | 584     | pfam00669~cl02760~pfam00700             | Flagellin_N~NEAT~Flagellin_C                               |           |
| 4       | Bacteria                   | 2       | pfam00669~pfam12211~pfam00700           | Flagellin_N~LMWSP_N~Flagellin_C                            |           |
| 4       | Vibrio                     | 662     | pfam00669~pfam07196~pfam14925~pfam00700 | Flagellin_N~Flagellin_IN~HPHLAWLY~Flagellin_C              |           |
| 4       | Methylibium                | 316612  | pfam00669~cl00261~pfam00700             | Flagellin_N~PLPDE_III~Flagellin_C                          |           |
| 4       | Butyrivibrio               | 830     | pfam00669~pfam06156~pfam00700           | Flagellin_N~DUF972~Flagellin_C                             |           |
| 4       | Bacteria                   | 2       | pfam00669~cl15685~pfam00700             | Flagellin_N~Wzt_C-like~Flagellin_C                         |           |
| 3       | Bacteria                   | 2       | pfam00669~cl07060~pfam00700             | Flagellin_N~NPCBM~Flagellin_C                              |           |
| 3       | Bacteria                   | 2       | pfam00669~cl21487~pfam00700             | Flagellin_N~OM_channels~Flagellin_C                        |           |
| 3       | Bacteria                   | 2       | pfam00669~pfam13861~pfam00700           | Flagellin_N~FLgD_tudor~Flagellin_C                         |           |
| 3       | Gammaproteobacteria        | 1236    | pfam00669~TIGR02597~pfam00700           | Flagellin_N~TIGR02597~Flagellin_C                          |           |



|   |                              |         |                                               |                                                                         |
|---|------------------------------|---------|-----------------------------------------------|-------------------------------------------------------------------------|
| 3 | Roseburia inulinivorans      | 360807  | pfam00669~cl00342~pfam00700                   | Flagellin_N~Trp-synth-beta_II~Flagellin_C                               |
| 3 | Vibrio                       | 662     | pfam00669~pfam07196~cl21456~pfam00700         | Flagellin_N~Flagellin_IN~Periplasmic_Binding_Protein_Type_2~Flagellin_C |
| 3 | Clostridium tyrobutyricum    | 1519    | pfam00669~cl21455~pfam00700                   | Flagellin_N~P-loop_NTPase~Flagellin_C                                   |
| 3 | Carnobacterium sp. 17-4      | 208596  | pfam00669~cl01110~pfam00700                   | Flagellin_N~Sdh5~Flagellin_C                                            |
| 3 | Bacillales                   | 1385    | pfam00669~pfam04574~pfam00700                 | Flagellin_N~DUF592~Flagellin_C                                          |
| 3 | Gluconobacter oxydans        | 442     | pfam00669~cl11960~pfam00700                   | Flagellin_N~Ig~Flagellin_C                                              |
| 2 | Bacteria                     | 2       | pfam00669~pfam07559~pfam00700                 | Flagellin_N~FlaE~Flagellin_C                                            |
| 2 | Bacteria                     | 2       | pfam00669~cl18945~pfam00700                   | Flagellin_N~AAT_I~Flagellin_C                                           |
| 2 | Enterobacteriaceae           | 543     | pfam00669~cl05878~pfam00700                   | Flagellin_N~TraK~Flagellin_C                                            |
| 2 | Arcobacter butzleri          | 28197   | pfam00669~cl18951~pfam00700                   | Flagellin_N~Amidase~Flagellin_C                                         |
| 2 | Chitinibacter                | 230666  | pfam00669~cl09928~pfam00700                   | Flagellin_N~Molybdopterine-Binding~Flagellin_C                          |
| 2 | Bacteria                     | 2       | pfam00669~cl00192~pfam00700                   | Flagellin_N~ribokinase_pfkB_like~Flagellin_C                            |
| 2 | Azoarcus sp. CIB             | 198107  | pfam00669~pfam09249~pfam00700                 | Flagellin_N~tRNA_NucTransf2~Flagellin_C                                 |
| 2 | delta proteobacterium MLMS-1 | 262489  | pfam00669~pfam07196~cl00160~cl02073~pfam00700 | Flagellin_N~Flagellin_IN~LbetaH~DUF3422~Flagellin_C                     |
| 2 | Bacillus alcalophilus        | 1445    | pfam00669~pfam11589~pfam00700                 | Flagellin_N~DUF3244~Flagellin_C                                         |
| 2 | Borrelia lusitaniae          | 100177  | pfam00669~pfam14796~pfam00700                 | Flagellin_N~AP3B1_C~Flagellin_C                                         |
| 2 | Nitrospira defluvii          | 330214  | pfam00669~cl21542~pfam00700                   | Flagellin_N~EthD~Flagellin_C                                            |
| 2 | Firmicutes                   | 1239    | pfam00669~cl23771~pfam00700                   | Flagellin_N~Big_3_4~Flagellin_C                                         |
| 2 | Rhodospirillum rubrum        | 265488  | pfam00669~cl10557~pfam00700                   | Flagellin_N~Dak1~Flagellin_C                                            |
| 2 | Gammaproteobacteria          | 1236    | pfam00669~cl11964~pfam00700                   | Flagellin_N~CYTH-like_Pase~Flagellin_C                                  |
| 2 | Bacillus sp. SG-1            | 161544  | pfam00669~cl14647~pfam00700                   | Flagellin_N~GH43_62_32_68~Flagellin_C                                   |
| 2 | Bacteria                     | 2       | pfam00669~cl14876~pfam00700                   | Flagellin_N~Zinc_peptidase_like~Flagellin_C                             |
| 2 | Enterobacter cloacae         | 550     | pfam00669~cl22495~pfam00700                   | Flagellin_N~Gp23~Flagellin_C                                            |
| 2 | Cellvibrio sp. BR            | 1134474 | pfam00669~cl01077~pfam00700                   | Flagellin_N~SIMPL~Flagellin_C                                           |
| 2 | Idiomarina xiamenensis       | 1207041 | pfam00669~cl00278~pfam00700                   | Flagellin_N~CCC1_like~Flagellin_C                                       |
| 2 | Rhodospirillaceae            | 41295   | pfam00669~pfam10983~pfam00700                 | Flagellin_N~DUF2793~Flagellin_C                                         |
| 1 | Bdellovibrio bacteriovorus   | 959     | pfam00669~cl01193~pfam00700                   | Flagellin_N~DUF463~Flagellin_C                                          |
| 1 | Paenibacillus alginolyticus  | 59839   | pfam00669~cl21457~pfam00700                   | Flagellin_N~TIM_phosphate_binding~Flagellin_C                           |
| 1 | Nematostella vectensis       | 45351   | pfam00700~pfam00669                           | Flagellin_C~Flagellin_N                                                 |
| 1 | Lactobacillus capillatus     | 480931  | pfam00669~cl01389~pfam00700                   | Flagellin_N~Phage_sheath_1~Flagellin_C                                  |
| 1 | Escherichia fergusonii       | 564     | pfam00669~cl00262~pfam00700                   | Flagellin_N~TroA-like~Flagellin_C                                       |

**Supplementary Table 2. Eighty-six predicted "proteolytic flagellins" identified in the NCBI database.** All possess a putative gluzincin-family metallopeptidase domain in their hypervariable region.

| GI        | Ref            | Name                                        | Species                                    |
|-----------|----------------|---------------------------------------------|--------------------------------------------|
| 738243862 | WP_036199097.1 | hypothetical protein                        | Lysinibacillus sinduriensis                |
| 916691384 | WP_051298475.1 | hypothetical protein                        | Marinobacterium litorale                   |
| 518372292 | WP_019542499.1 | hypothetical protein                        | Selenomonas bovis                          |
| 916573195 | WP_051180286.1 | hypothetical protein                        | Selenomonas ruminantium                    |
| 504238503 | WP_014425605.1 | putative flagellin                          | Selenomonas ruminantium                    |
| 917028657 | WP_051635369.1 | hypothetical protein                        | Selenomonas sp. ND2010                     |
| 916926872 | WP_051533584.1 | hypothetical protein                        | Anaerovibrio sp. RM50                      |
| 917657302 | WP_052211964.1 | hypothetical protein                        | Anaerovibrio lipolyticus                   |
| 653148213 | WP_027397410.1 | hypothetical protein                        | Anaerovibrio lipolyticus                   |
| 507777340 | EOS35535.1     | hypothetical protein                        | C808_04738 Lachnospiraceae bacterium M18-1 |
| 551000896 | WP_022745605.1 | hypothetical protein                        | Dorea sp. 5-2                              |
| 507824683 | EOS80891.1     | hypothetical protein                        | C817_01227 Dorea sp. 5-2                   |
| 769144802 | WP_044921500.1 | hypothetical protein                        | Lachnospiraceae bacterium MA2020           |
| 910018461 | WP_049973154.1 | hypothetical protein                        | Lachnospiraceae bacterium MC2017           |
| 910018462 | WP_049973155.1 | hypothetical protein                        | Lachnospiraceae bacterium MC2017           |
| 651905107 | WP_026658295.1 | hypothetical protein                        | Butyrivibrio sp. AC2005                    |
| 697062782 | WP_033152383.1 | hypothetical protein                        | Pseudobutyrvibrio ruminis                  |
| 769166148 | WP_044939094.1 | hypothetical protein                        | Pseudobutyrvibrio sp. LB2011               |
| 651903221 | WP_026657293.1 | hypothetical protein                        | Butyrivibrio sp. AC2005                    |
| 551017073 | WP_022761310.1 | flagellin                                   | Butyrivibrio sp. AD3002                    |
| 651387362 | WP_026499388.1 | hypothetical protein                        | Butyrivibrio sp. WCD2001                   |
| 651394250 | WP_026505968.1 | hypothetical protein                        | Butyrivibrio sp. NC3005                    |
| 551028220 | WP_022772304.1 | flagellin                                   | Butyrivibrio sp. AE2015                    |
| 916590076 | WP_051197167.1 | hypothetical protein                        | Butyrivibrio sp. XBB1001                   |
| 490739930 | WP_004602238.1 | flagellin/flagellar hook associated protein | Eubacterium cellulosolvens                 |
| 916920396 | WP_051527108.1 | hypothetical protein                        | Eubacterium cellulosolvens                 |
| 517856800 | WP_019027008.1 | hypothetical protein                        | Colwellia piezophila                       |
| 766745642 | WP_044831744.1 | hypothetical protein                        | Thalassomonas actiniarum                   |
| 766760745 | WP_044838529.1 | hypothetical protein                        | Thalassomonas viridans                     |
| 654652764 | WP_028113749.1 | hypothetical protein                        | Ferrimonas kyonanensis                     |
| 916608721 | WP_051215812.1 | hypothetical protein                        | Ferrimonas futtsuensis                     |
| 497523220 | WP_009837418.1 | flagellar protein                           | Pseudoalteromonas tunicata                 |
| 654852782 | WP_028305148.1 | hypothetical protein                        | Oceanospirillum maris                      |
| 654847818 | WP_028300311.1 | hypothetical protein                        | Oceanospirillum beijerinckii               |
| 518442882 | WP_019613089.1 | hypothetical protein                        | Psychromonas ossibalaenae                  |
| 655481215 | WP_028863050.1 | hypothetical protein                        | Psychromonas aquimarina                    |
| 917474576 | WP_052080993.1 | hypothetical protein                        | Pseudomonas sp. ML96                       |

|                 |                   |                                    |                                         |
|-----------------|-------------------|------------------------------------|-----------------------------------------|
| 917193838       | WP_051800550.1    | hypothetical protein               | <i>Pseudomonas oleovorans</i>           |
| 1057533868      | WP_068829844.1    | hypothetical protein               | <i>Pseudomonas</i> sp. BMS12            |
| 759519778       | WP_043240123.1    | hypothetical protein               | <i>Pseudomonas alcaligenes</i>          |
| 544803667       | WP_021220822.1    | hypothetical protein               | <i>Pseudomonas alcaligenes</i>          |
| 919350262       | WP_052807587.1    | hypothetical protein               | <i>Pseudomonas</i> sp. FeS53a           |
| 758832821       | KIV71406.1        | Flagellin protein FlaB             | <i>Pseudomonas</i> sp. FeS53a           |
| 495134114       | WP_007858923.1    | flagellin                          | <i>Acidovorax</i> sp. CF316             |
| 950225299       | WP_057269442.1    | flagellin                          | <i>Acidovorax</i> sp. Root219           |
| 948088328       | WP_056747048.1    | flagellin                          | <i>Acidovorax</i> sp. Root568           |
| 947398799       | WP_056064769.1    | flagellin                          | <i>Acidovorax</i> sp. Root402           |
| 1023918667      | WP_063462804.1    | flagellin                          | <i>Acidovorax</i> sp. GW101-3H11        |
| 498146157       | WP_010460313.1    | flagellin                          | <i>Acidovorax radicans</i>              |
| 950228284       | WP_057272374.1    | flagellin                          | <i>Acidovorax</i> sp. Root267           |
| 950175389       | WP_057223076.1    | flagellin                          | <i>Acidovorax</i> sp. Root275           |
| 493342448       | WP_006299301.1    | flagellin                          | <i>Hylemonella gracilis</i>             |
| 737635795       | WP_035605832.1    | flagellin                          | <i>Hylemonella gracilis</i>             |
| 1054768843      | WP_066532860.1    | flagellin                          | <i>Comamonas terrigena</i>              |
| 759662642       | WP_043380247.1    | flagellin                          | <i>Comamonas aquatica</i>               |
| 835203907       | WP_047395168.1    | hypothetical protein               | <i>Chitinibacter</i> sp. ZOR0017        |
| 654999239       | WP_028448441.1    | hypothetical protein               | <i>Chitinibacter tainanensis</i>        |
| 517221226       | WP_018410044.1    | hypothetical protein               | <i>Methyloversatilis thermotolerans</i> |
| 1059956041      | WP_069037803.1    | hypothetical protein               | <i>Methyloversatilis</i> sp. RAC08      |
| 1059488308      | AOF81425.1        | hypothetical protein BSY238_565    | <i>Methyloversatilis</i> sp. RAC08      |
| 522143982       | WP_020655191.1    | hypothetical protein               | <i>Massilia niastensis</i>              |
| 916699479       | WP_051306570.1    | hypothetical protein               | <i>Massilia alkalitolerans</i>          |
| 947778910       | WP_056440654.1    | hypothetical protein               | <i>Massilia</i> sp. Root335             |
| 738284338       | WP_036238512.1    | hypothetical protein               | <i>Massilia</i> sp. JS1662              |
| 947464650       | WP_056129008.1    | MULTISPECIES: hypothetical protein | <i>Massilia</i>                         |
| 500090247       | WP_011766260.1    | flagellin                          | <i>Azoarcus</i> sp. BH72                |
| 1043078958      | WP_065340783.1    | hypothetical protein               | <i>Azoarcus olearius</i>                |
| 847184073       | WP_047967967.1    | hypothetical protein               | <i>Vogesella</i> sp. EB                 |
| 938316768       | WP_054620994.1    | hypothetical protein               | <i>Rhodocyclaceae bacterium Paddy-1</i> |
| 737307010       | WP_035289894.1    | hypothetical protein               | <i>Clostridium</i> sp. KNHs214          |
| 746179135       | WP_039238750.1    | hypothetical protein               | <i>Clostridium novyi</i>                |
| 746201658       | WP_039258875.1    | hypothetical protein               | <i>Clostridium botulinum</i>            |
| 746169334       | WP_039229452.1    | hypothetical protein               | <i>Clostridium haemolyticum</i>         |
| <b>19910973</b> | <b>BAB87738.1</b> | <b>flagellin protein FliA(H)</b>   | <b><i>Clostridium haemolyticum</i></b>  |
| 746189539       | WP_039247767.1    | hypothetical protein               | <i>Clostridium novyi</i>                |
| 737261571       | WP_035245515.1    | hypothetical protein               | <i>Desulfobulbus mediterraneus</i>      |
| 492846401       | WP_006000355.1    | flagellin-like                     | <i>Desulfuromonas acetoxidans</i>       |
| 550893434       | WP_022654199.1    | flagellin                          | <i>Aquaspirillum serpens</i>            |
| 1062631149      | WP_069313537.1    | hypothetical protein               | <i>Piscirickettsia</i> sp. Y2           |

|            |                |                                             |                                         |
|------------|----------------|---------------------------------------------|-----------------------------------------|
| 737346898  | WP_035329181.1 | hypothetical protein                        | Bacillus firmus                         |
| 766666229  | WP_044826104.1 | hypothetical protein                        | Clostridium aceticum                    |
| 738759210  | WP_036652630.1 | hypothetical protein                        | Paenibacillus wynnii                    |
| 504121263  | WP_014355249.1 | flagellin                                   | Acetobacterium woodii                   |
| 503951982  | WP_014185976.1 | flagellin/flagellar hook associated protein | Desulfosporosinus orientis              |
| 505207458  | WP_015394560.1 | flagellin                                   | Clostridium<br>saccharoperbutylaceticum |
| 1011282853 | WP_062200331.1 | hypothetical protein                        | Bacillaceae bacterium mt8               |

**Supplementary Table 3. Identified proteins and their MS/MS spectral numbers from LC-MS/MS analysis of in-gel digests (FDR ≤ 1%).**

| UniProt      | Gene             | Protein Description                                 | Total Indep. Spectra | Percent Share of Spectrum Ids |
|--------------|------------------|-----------------------------------------------------|----------------------|-------------------------------|
| Q8RR94 (mod) | Trx::FliA(H)-HVR | Trx::FliA(H)-HVR                                    | 11630                | 95.1                          |
| P17169       | GLMS_ECOLI       | Glutamine-fructose-6-phosphate transaminase         | 242                  | 2.0                           |
| P0A6Y8       | DNAK_ECOLI       | Chaperone protein DnaK                              | 131                  | 1.1                           |
| P0A9K9       | SLYD_ECOLI       | FKBP-type peptidyl-prolyl cis-trans isomerase       | 105                  | 0.9                           |
| P0A6T5       | GCH1_ECOLI       | GTP cyclohydrolase 1                                | 32                   | 0.3                           |
| P77398       | ARNA_ECOLI       | Bifunctional polymyxin resistance protein ArnA      | 21                   | 0.2                           |
| P0ACJ8       | CRP_ECOLI        | cAMP-activated global transcriptional regulator CRP | 22                   | 0.2                           |
| P0A7M2       | RL28_ECOLI       | 50S ribosomal protein L28                           | 17                   | 0.1                           |
| P76270       | MSRC_ECOLI       | Free methionine-R-sulfoxide reductase               | 12                   | 0.1                           |
| P64588       | YQJI_ECOLI       | Transcriptional regulator YqjI                      | 11                   | 0.1                           |
| P0AFD1       | NUOE_ECOLI       | NADH-quinone oxidoreductase subunit E               | 12                   | 0.1                           |

## Supplementary Discussion

**Specificity differences between flagellinolysin and collagenase.** Flagellinolysin has a deep-pocket MMP-like specificity subsite in S1', inferred from the P1' specificity and structural models, with a strong preference for leucine, isoleucine and phenylalanine. However, flagellinolysin lacks the second MMP hallmark preference for proline in P3, selecting for valine, isoleucine, and threonine instead. Nonetheless, as P3 is distant from P1' this may relax the P3 specificity to accommodate the less preferred proline in some substrates explaining the experimentally observed cleavage of QF24 (PLG↓L). Medium sized hydrophobic residues such as alanine, valine, isoleucine and proline were preferred in both libraries in P2' and P3'. An intermediate preference for polar residues such as asparagine, glutamine, and threonine was also revealed in both peptide libraries for positions P2 and P1 (Fig. 4b)—the specificity profile of which is also in agreement with our QF peptide assays, since PLG↓V was not cleaved (Fig. 4d) and valine is not preferred at P1' (Fig. 4b).
